# Supplementary material for: The Therapeutic Relationship in China: A Systematic Review and Meta-Analysis
Source: MDPI journal article supplement (doi:10.3390/ijerph18073460), 2021-03-26
Supplement: s1 [file s1]

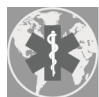

## Supplementary Materials

### 1. The Search Strategy

#### Key word

China/Chinese

Doctor-patient relationship/ Patient-doctor relationship/ Clinician-patient relationship/ Patient-clinician relationship/ Therapist-patient relationship/ Patient-therapist relationship/ Physician-patient relationship/ Patient-Physician relationship/ Doctor-patient relation/ Patient-doctor relation/ Clinician-patient relation/ Patient-clinician relation/ Therapist-patient relation/ Patient-therapist relation/ Physician-patient relation/ Patient-physician relation/ The relationship between doctor and patient/ The relationship between clinician and patient/ The relationship between physician and patient/ The relation between doctor and patient/ The relation between clinician and patient/ The relation between physician and patient/ The interactions between doctor and patient/ The interactions between clinician and patient/ The interactions between physician and patient/ Medical dispute/ Conflict between doctor and patient/ Conflict between physician and patient/ Conflict between clinician and patient/ Nurse-patient relationship/ Medical trouble Determinants/ Factors/ Influences

中国、中国的

医患矛盾、医患关系、医患纠纷、医疗纠纷、医闹

影响因素、成因

**Search strategy (Publication date: Jan. 2000 to Jan. 2020)**

#### Database 1: CAJD (CNKI)

SU= (‘医患矛盾’+‘医患关系’+‘医患纠纷’+‘医疗纠纷’+‘医闹’) AND SU= (‘影响因素’+‘成因’)

**Search Results: 634**

#### Database 2: CSPD (WANFANG Data)

(题名或关键词:(医患矛盾)+题名或关键词:(医患关系)+题名或关键词:(医患纠纷)+题名或关键词:(医疗纠纷)+题名或关键词:(医闹)) and (题名或关键词:(影响因素)+题名或关键词:(成因))

**Search Results: 973**

#### Database 3: CBM (SinoMed)

(((((“医患矛盾”[标题:智能]) OR “医患关系”[标题:智能]) OR “医患纠纷”[标题:智能]) OR “医疗纠纷”[标题:智能]) OR “医闹”[标题:智能]) AND (“影响因素”[标题:智能] OR (“成因”[标题:智能]))

**Search Results: 415**

**Table S1.** Database 4: PubMed (NCBI)

| Search | Query                                                                                                                  | Items Found |
|--------|------------------------------------------------------------------------------------------------------------------------|-------------|
| #1     | Search (China[MeSH Terms]) OR<br>China[Title/Abstract]                                                                 | 251,210     |
| #2     | Search (Chinese[MeSH Terms]) OR<br>Chinese[Title/Abstract]                                                             | 242,638     |
| #3     | Search (((China[MeSH Terms]) OR<br>China[Title/Abstract])) OR<br>((Chinese[MeSH Terms]) OR<br>Chinese[Title/Abstract]) | 416,173     |
| #4     | Search (Doctor-patient<br>relationship[MeSH Terms]) OR<br>Doctor-patient<br>relationship[Title/Abstract]               | 3359        |
| #5     | Search (Patient-doctor<br>relationship[MeSH Terms]) OR<br>Patient-doctor<br>relationship[Title/Abstract]               | 505         |
| #6     | Search (Clinician-patient<br>relationship[MeSH Terms]) OR<br>Clinician-patient<br>relationship[Title/Abstract]         | 152         |
| #7     | Search (Patient-clinician<br>relationship[MeSH Terms]) OR<br>Patient-clinician<br>relationship[Title/Abstract]         | 115         |
| #8     | Search (Therapist-patient<br>relationship[MeSH Terms]) OR<br>Therapist-patient<br>relationship[Title/Abstract]         | 87          |
| #9     | Search (Patient-therapist<br>relationship[MeSH Terms]) OR<br>Patient-therapist<br>relationship[Title/Abstract]         | 104         |
| #10    | Search (Physician-patient<br>relationship[MeSH Terms]) OR<br>Physician-patient<br>relationship[Title/Abstract]         | 72,201      |
| #11    | Search (Patient-physician<br>relationship[MeSH Terms]) OR<br>Patient-physician<br>relationship[Title/Abstract]         | 71,999      |
| #12    | Search (Doctor-patient relation[MeSH<br>Terms]) OR Doctor-patient<br>relation[Title/Abstract]                          | 71,557      |
| #13    | Search (Patient-doctor relation[MeSH<br>Terms]) OR Patient-doctor<br>relation[Title/Abstract]                          | 41          |
| #14    | Search (Clinician-patient<br>relation[MeSH Terms]) OR Clinician-<br>patient relation[Title/Abstract]                   | 41          |

|     |                                                                                                                                       |        |
|-----|---------------------------------------------------------------------------------------------------------------------------------------|--------|
| #15 | Search (Patient-clinician relation[MeSH Terms]) OR Patient-clinician relation[Title/Abstract]                                         | 35     |
| #16 | Search (Therapist-patient relation[MeSH Terms]) OR Therapist-patient relation[Title/Abstract]                                         | 18     |
| #17 | Search (Patient-therapist relation[MeSH Terms]) OR Patient-therapist relation[Title/Abstract]                                         | 19     |
| #18 | Search (Physician-patient relation[MeSH Terms]) OR Physician-patient relation[Title/Abstract]                                         | 71,547 |
| #19 | Search (Patient-physician relation[MeSH Terms]) OR Patient-physician relation[Title/Abstract]                                         | 6087   |
| #20 | Search (The relationship between doctor and patient[MeSH Terms]) OR The relationship between doctor and patient[Title/Abstract]       | 876    |
| #21 | Search (The relationship between clinician and patient[MeSH Terms]) OR The relationship between clinician and patient[Title/Abstract] | 55     |
| #22 | Search (The relationship between physician and patient[MeSH Terms]) OR The relationship between physician and patient[Title/Abstract] | 10,895 |
| #23 | Search (The relation between doctor and patient[MeSH Terms]) OR The relation between doctor and patient[Title/Abstract]               | 1423   |
| #24 | Search (The relation between clinician and patient[MeSH Terms]) OR The relation between clinician and patient[Title/Abstract]         | 106    |
| #25 | Search (The relation between physician and patient[MeSH Terms]) OR The relation between physician and patient[Title/Abstract]         | 16,531 |
| #26 | Search (The interactions between doctor and patient[MeSH Terms]) OR The interactions between doctor and patient[Title/Abstract]       | 153    |
| #27 | Search (The interactions between clinician and patient[MeSH Terms]) OR The interactions between clinician and patient[Title/Abstract] | 20     |
| #28 | Search (The interactions between physician and patient[MeSH Terms]) OR The interactions between physician and patient[Title/Abstract] | 1899   |

|     |                                                                                                                                                                                                                                                                                                                                                                                                                                                                                                                                                                                                                                                                                                                                                                                                                                                                                                                                                                                                                                                                                                        |         |
|-----|--------------------------------------------------------------------------------------------------------------------------------------------------------------------------------------------------------------------------------------------------------------------------------------------------------------------------------------------------------------------------------------------------------------------------------------------------------------------------------------------------------------------------------------------------------------------------------------------------------------------------------------------------------------------------------------------------------------------------------------------------------------------------------------------------------------------------------------------------------------------------------------------------------------------------------------------------------------------------------------------------------------------------------------------------------------------------------------------------------|---------|
| #29 | Search (Medical dispute[MeSH Terms]) OR Medical dispute[Title/Abstract]                                                                                                                                                                                                                                                                                                                                                                                                                                                                                                                                                                                                                                                                                                                                                                                                                                                                                                                                                                                                                                | 2004    |
| #30 | Search (Conflict between doctor and patient[MeSH Terms]) OR Conflict between doctor and patient[Title/Abstract]                                                                                                                                                                                                                                                                                                                                                                                                                                                                                                                                                                                                                                                                                                                                                                                                                                                                                                                                                                                        | 127     |
| #31 | Search (Conflict between physician and patient[MeSH Terms]) OR Conflict between physician and patient[Title/Abstract]                                                                                                                                                                                                                                                                                                                                                                                                                                                                                                                                                                                                                                                                                                                                                                                                                                                                                                                                                                                  | 1766    |
| #32 | Search (Conflict between clinician and patient[MeSH Terms]) OR Conflict between clinician and patient[Title/Abstract]                                                                                                                                                                                                                                                                                                                                                                                                                                                                                                                                                                                                                                                                                                                                                                                                                                                                                                                                                                                  | 13      |
| #33 | Search (Medical trouble[MeSH Terms]) OR Medical trouble[Title/Abstract]                                                                                                                                                                                                                                                                                                                                                                                                                                                                                                                                                                                                                                                                                                                                                                                                                                                                                                                                                                                                                                | 1882    |
| #34 | Search (Nurse-patient relationship[MeSH Terms]) OR Nurse-patient relationship[Title/Abstract]                                                                                                                                                                                                                                                                                                                                                                                                                                                                                                                                                                                                                                                                                                                                                                                                                                                                                                                                                                                                          | 19,898  |
| #35 | Search (((((((((((((((((((((((((Doctor-patient relationship[MeSH Terms]) OR Doctor-patient relationship[Title/Abstract])) OR ((Patient-doctor relationship[MeSH Terms]) OR Patient-doctor relationship[Title/Abstract])) OR ((Clinician-patient relationship[MeSH Terms]) OR Clinician-patient relationship[Title/Abstract])) OR ((Patient-clinician relationship[MeSH Terms]) OR Patient-clinician relationship[Title/Abstract])) OR ((Therapist-patient relationship[MeSH Terms]) OR Therapist-patient relationship[Title/Abstract])) OR ((Patient-therapist relationship[MeSH Terms]) OR Patient-therapist relationship[Title/Abstract])) OR ((Physician-patient relationship[MeSH Terms]) OR Physician-patient relationship[Title/Abstract])) OR ((Patient-physician relationship[MeSH Terms]) OR Patient-physician relationship[Title/Abstract])) OR ((Doctor-patient relation[MeSH Terms]) OR Doctor-patient relation[Title/Abstract])) OR ((Patient-doctor relation[MeSH Terms]) OR Patient-doctor relation[Title/Abstract])) OR ((Clinician-patient relation[MeSH Terms]) OR Clinician-patient | 121,481 |

---

relation[Title/Abstract])) OR ((Patient-  
clinician relation[MeSH Terms]) OR  
Patient-clinician  
relation[Title/Abstract])) OR  
((Therapist-patient relation[MeSH  
Terms]) OR Therapist-patient  
relation[Title/Abstract])) OR ((Patient-  
therapist relation[MeSH Terms]) OR  
Patient-therapist  
relation[Title/Abstract])) OR  
((Physician-patient relation[MeSH  
Terms]) OR Physician-patient  
relation[Title/Abstract])) OR ((Patient-  
physician relation[MeSH Terms]) OR  
Patient-physician  
relation[Title/Abstract])) OR ((The  
relationship between doctor and  
patient[MeSH Terms]) OR The  
relationship between doctor and  
patient[Title/Abstract])) OR ((The  
relationship between clinician and  
patient[MeSH Terms]) OR The  
relationship between clinician and  
patient[Title/Abstract])) OR ((The  
relationship between physician and  
patient[MeSH Terms]) OR The  
relationship between physician and  
patient[Title/Abstract])) OR ((The  
relation between doctor and  
patient[MeSH Terms]) OR The relation  
between doctor and  
patient[Title/Abstract])) OR ((The  
relation between clinician and  
patient[MeSH Terms]) OR The relation  
between clinician and  
patient[Title/Abstract])) OR ((The  
relation between physician and  
patient[MeSH Terms]) OR The relation  
between physician and  
patient[Title/Abstract])) OR ((The  
interactions between doctor and  
patient[MeSH Terms]) OR The  
interactions between doctor and  
patient[Title/Abstract])) OR ((The  
interactions between clinician and  
patient[MeSH Terms]) OR The  
interactions between clinician and  
patient[Title/Abstract])) OR ((The  
interactions between physician and  
patient[MeSH Terms]) OR The  
interactions between physician and  
patient[Title/Abstract])) OR ((Medical

---



---

((Physician-patient relationship[MeSH Terms]) OR Physician-patient relationship[Title/Abstract])) OR ((Patient-physician relationship[MeSH Terms]) OR Patient-physician relationship[Title/Abstract])) OR ((Doctor-patient relation[MeSH Terms]) OR Doctor-patient relation[Title/Abstract])) OR ((Patient-doctor relation[MeSH Terms]) OR Patient-doctor relation[Title/Abstract])) OR ((Clinician-patient relation[MeSH Terms]) OR Clinician-patient relation[Title/Abstract])) OR ((Patient-clinician relation[MeSH Terms]) OR Patient-clinician relation[Title/Abstract])) OR ((Therapist-patient relation[MeSH Terms]) OR Therapist-patient relation[Title/Abstract])) OR ((Patient-therapist relation[MeSH Terms]) OR Patient-therapist relation[Title/Abstract])) OR ((Physician-patient relation[MeSH Terms]) OR Physician-patient relation[Title/Abstract])) OR ((Patient-physician relation[MeSH Terms]) OR Patient-physician relation[Title/Abstract])) OR ((The relationship between doctor and patient[MeSH Terms]) OR The relationship between doctor and patient[Title/Abstract])) OR ((The relationship between clinician and patient[MeSH Terms]) OR The relationship between clinician and patient[Title/Abstract])) OR ((The relationship between physician and patient[MeSH Terms]) OR The relationship between physician and patient[Title/Abstract])) OR ((The relation between doctor and patient[MeSH Terms]) OR The relation between doctor and patient[Title/Abstract])) OR ((The relation between clinician and patient[MeSH Terms]) OR The relation between clinician and patient[Title/Abstract])) OR ((The relation between physician and patient[MeSH Terms]) OR The relation between physician and

---

---

patient[Title/Abstract])) OR ((The  
 interactions between doctor and  
 patient[MeSH Terms]) OR The  
 interactions between doctor and  
 patient[Title/Abstract])) OR ((The  
 interactions between clinician and  
 patient[MeSH Terms]) OR The  
 interactions between clinician and  
 patient[Title/Abstract])) OR ((The  
 interactions between physician and  
 patient[MeSH Terms]) OR The  
 interactions between physician and  
 patient[Title/Abstract])) OR ((Medical  
 dispute[MeSH Terms]) OR Medical  
 dispute[Title/Abstract])) OR ((conflict  
 between doctor and patient[MeSH  
 Terms]) OR conflict between doctor  
 and patient[Title/Abstract])) OR  
 ((conflict between physician and  
 patient[MeSH Terms]) OR conflict  
 between physician and  
 patient[Title/Abstract])) OR ((conflict  
 between clinician and patient[MeSH  
 Terms]) OR conflict between clinician  
 and patient[Title/Abstract])) OR  
 ((Medical trouble[MeSH Terms]) OR  
 Medical trouble[Title/Abstract])) OR  
 ((Nurse-patient relationship[MeSH  
 Terms]) OR Nurse-patient  
 relationship[Title/Abstract])) AND  
 (((((Determinants[MeSH Terms]) OR  
 Determinants[Title/Abstract])) OR  
 ((factors[MeSH Terms]) OR  
 factors[Title/Abstract])) OR  
 ((influences[MeSH Terms]) OR  
 influences[Title/Abstract]))

---

Studies with publication date from Jan.1.2000 to Jan.1.2020 are included.

199

MeSH (Medical Subject Headings) is the NLM (National Library Of Medicine) controlled vocabulary thesaurus used for indexing articles for PubMed.



**Table S2.** Database 5: EMBASE.

| No. | Query                                                                                                                                  | Results |
|-----|----------------------------------------------------------------------------------------------------------------------------------------|---------|
| #1  | (China <sup>a</sup> ti,ab,kw OR China <sup>a</sup> exp) AND<br>[2000–2020]/py                                                          | 256,538 |
| #2  | (Chinese <sup>a</sup> ti,ab,kw OR Chinese <sup>a</sup> exp)<br>AND [2000–2020]/py                                                      | 234,849 |
| #3  | #1 OR #2                                                                                                                               | 423,407 |
| #4  | (Doctor-patient relationship <sup>a</sup> ti,ab,kw<br>OR Doctor-patient relationship <sup>a</sup> exp)<br>AND [2000–2020]/py           | 84,896  |
| #5  | (Patient-doctor relationship <sup>a</sup> ti,ab,kw<br>OR Patient-doctor relationship <sup>a</sup> exp)<br>AND [2000–2020]/py           | 84,245  |
| #6  | Clinician-patient relationship <sup>a</sup> ti,ab,kw<br>AND [2000–2020]/py                                                             | 163     |
| #7  | Patient-clinician relationship <sup>a</sup> ti,ab,kw<br>AND [2000–2020]/py                                                             | 139     |
| #8  | (Therapist-patient<br>relationship <sup>a</sup> ti,ab,kw OR Therapist-<br>patient relationship <sup>a</sup> exp) AND<br>[2000–2020]/py | 84,132  |
| #9  | (Patient-therapist<br>relationship <sup>a</sup> ti,ab,kw OR Patient-<br>therapist relationship <sup>a</sup> exp) AND<br>[2000–2020]/py | 84,139  |
| #10 | (Physician-patient<br>relationship <sup>a</sup> ti,ab,kw OR Physician-<br>patient relationship <sup>a</sup> exp) AND<br>[2000–2020]/py | 84,546  |
| #11 | (Patient-Physician<br>relationship <sup>a</sup> ti,ab,kw OR Patient-<br>Physician relationship <sup>a</sup> exp) AND<br>[2000–2020]/py | 84,409  |
| #12 | (Doctor-patient relation <sup>a</sup> ti,ab,kw OR<br>Doctor-patient relation <sup>a</sup> exp) AND<br>[2000–2020]/py                   | 84,111  |
| #13 | (Patient-doctor relation <sup>a</sup> ti,ab,kw OR<br>Patient-doctor relation <sup>a</sup> exp) AND<br>[2000–2020]/py                   | 84,102  |
| #14 | Clinician-patient relation <sup>a</sup> ti,ab,kw<br>AND [2000–2020]/py                                                                 | 2       |
| #15 | Patient-clinician relation <sup>a</sup> ti,ab,kw<br>AND [2000–2020]/py                                                                 | 2       |
| #16 | (Therapist-patient relation <sup>a</sup> ti,ab,kw<br>OR Therapist-patient relation <sup>a</sup> exp)<br>AND [2000–2020]/py             | 84,098  |
| #17 | (Patient-therapist relation <sup>a</sup> ti,ab,kw OR<br>Patient-therapist relation <sup>a</sup> exp) AND<br>[2000–2020]/py             | 84,101  |

|     |                                                                                                                                                                                                                                |           |
|-----|--------------------------------------------------------------------------------------------------------------------------------------------------------------------------------------------------------------------------------|-----------|
| #18 | (Physician-patient relationship <sub>ti,ab,kw</sub><br>OR Physician-patient relationship <sub>exp</sub> )<br>AND [2000–2020]/py                                                                                                | 84,128    |
| #19 | (Patient-physician relationship <sub>ti,ab,kw</sub><br>OR Patient-physician relationship <sub>exp</sub> )<br>AND [2000–2020]/py                                                                                                | 84,105    |
| #20 | The relationship between doctor and<br>patient <sub>ti,ab,kw</sub> AND [2000–2020]/py                                                                                                                                          | 43        |
| #21 | The relationship between clinician and<br>patient <sub>ti,ab,kw</sub> AND [2000–2020]/py                                                                                                                                       | 5         |
| #22 | The relationship between physician<br>and patient <sub>ti,ab,kw</sub> AND [2000–<br>2020]/py                                                                                                                                   | 31        |
| #23 | The relation between doctor and<br>patient <sub>ti,ab,kw</sub> AND [2000–2020]/py                                                                                                                                              | 9         |
| #24 | The relation between clinician and<br>patient <sub>ti,ab,kw</sub> AND [2000–2020]/py                                                                                                                                           | 0         |
| #25 | The relation between physician and<br>patient <sub>ti,ab,kw</sub> AND [2000–2020]/py                                                                                                                                           | 7         |
| #26 | The interactions between doctor and<br>patient <sub>ti,ab,kw</sub> AND [2000–2020]/py                                                                                                                                          | 0         |
| #27 | The interactions between clinician and<br>patient <sub>ti,ab,kw</sub> AND [2000–2020]/py                                                                                                                                       | 0         |
| #28 | The interactions between physician<br>and patient <sub>ti,ab,kw</sub> AND [2000–<br>2020]/py                                                                                                                                   | 0         |
| #29 | Medical dispute <sub>ti,ab,kw</sub> AND<br>[2000–2020]/py                                                                                                                                                                      | 88        |
| #30 | Conflict between doctor and<br>patient <sub>ti,ab,kw</sub> AND [2000–2020]/py                                                                                                                                                  | 2         |
| #31 | Conflict between physician and<br>patient <sub>ti,ab,kw</sub> AND [2000–2020]/py                                                                                                                                               | 2         |
| #32 | Conflict between clinician and<br>patient <sub>ti,ab,kw</sub> AND [2000–2020]/py                                                                                                                                               | 0         |
| #33 | Medical trouble <sub>ti,ab,kw</sub> AND<br>[2000–2020]/py                                                                                                                                                                      | 4         |
| #34 | Nurse-patient relationship <sub>ti,ab,kw</sub><br>AND [2000–2020]/py                                                                                                                                                           | 662       |
| #35 | #4 OR #5 OR #6 OR #7 OR #8 OR #9 OR<br>#10 OR #11 OR #12 OR #13 OR #14 OR<br>#15 OR #16 OR #17 OR #18 OR #19 OR<br>#20 OR #21 OR #22 OR #23 OR #24 OR<br>#25 OR #26 OR #27 OR #28 OR #29 OR<br>#30 OR #31 OR #32 OR #33 OR #34 | 86,177    |
| #36 | Determinants <sub>ti,ab,kw</sub> AND<br>[2000–2020]/py                                                                                                                                                                         | 139,854   |
| #37 | Factors <sub>ti,ab,kw</sub> AND [2000–2020]/py                                                                                                                                                                                 | 2,162,156 |
| #38 | Influences <sub>ti,ab,kw</sub> AND<br>[2000–2020]/py                                                                                                                                                                           | 193,256   |
| #39 | #36 OR #37 OR #38                                                                                                                                                                                                              | 2,407,086 |
| #40 | #3 AND #35 AND #39                                                                                                                                                                                                             | 290       |

**Table S3.** Database 6: Web of Science (Publication Year: 2000–2020)

| No. | Query                                                                                                     | Results   |
|-----|-----------------------------------------------------------------------------------------------------------|-----------|
| #1  | TS = China                                                                                                | 1,069,687 |
| #2  | TS = Chinese                                                                                              | 885,620   |
| #3  | #1 OR #2                                                                                                  | 1,747,316 |
| #4  | TS = Doctor-patient relationship                                                                          | 4795      |
| #5  | TS = Patient-doctor relationship                                                                          | 875       |
| #6  | TS = Clinician-patient relationship                                                                       | 371       |
| #7  | TS = Patient-clinician relationship                                                                       | 419       |
| #8  | TS = Therapist-patient relationship                                                                       | 163       |
| #9  | TS = Patient-therapist relationship                                                                       | 229       |
| #10 | TS = Physician-patient relationship                                                                       | 9794      |
| #11 | TS = Patient-Physician relationship                                                                       | 2208      |
| #12 | TS = Doctor-patient relation                                                                              | 3976      |
| #13 | TS = Patient-doctor relation                                                                              | 746       |
| #14 | TS = Clinician-patient relation                                                                           | 380       |
| #15 | TS = Patient-clinician relation                                                                           | 464       |
| #16 | TS = Therapist-patient relation                                                                           | 120       |
| #17 | TS = Patient-therapist relation                                                                           | 202       |
| #18 | TS = Physician-patient relation                                                                           | 42,301    |
| #19 | TS = Patient-physician relation                                                                           | 2369      |
| #20 | TS = (The relationship between doctor and patient)                                                        | 6012      |
| #21 | TS = (The relationship between clinician and patient)                                                     | 7211      |
| #22 | TS = (The relationship between physician and patient)                                                     | 15,004    |
| #23 | TS = (The relation between doctor and patient)                                                            | 5318      |
| #24 | TS = (The relation between clinician and patient)                                                         | 3572      |
| #25 | TS = (The relation between physician and patient)                                                         | 14,193    |
| #26 | TS = (The interactions between doctor and patient)                                                        | 2345      |
| #27 | TS = (The interactions between clinician and patient)                                                     | 2774      |
| #28 | TS = (The interactions between physician and patient)                                                     | 5615      |
| #29 | TS=Medical dispute                                                                                        | 5030      |
| #30 | TS = (Conflict between doctor and patient)                                                                | 893       |
| #31 | TS = (Conflict between physician and patient)                                                             | 2208      |
| #32 | TS = (Conflict between clinician and patient)                                                             | 893       |
| #33 | TS = medical trouble                                                                                      | 6903      |
| #34 | TS = Nurse-patient relationship                                                                           | 3751      |
| #35 | #4 OR #5 OR #6 OR #7 OR #8 OR #9 OR #10 OR #11 OR #12 OR #13 OR #14 OR #15 OR #16 OR #17 OR #18 OR #19 OR | 91,769    |

|                                                                                                             |                    |            |
|-------------------------------------------------------------------------------------------------------------|--------------------|------------|
| #20 OR #21 OR #22 OR #23 OR #24 OR<br>#25 OR #26 OR #27 OR #28 OR #29 OR<br>#30 OR #31 OR #32 OR #33 OR #34 |                    |            |
| #36                                                                                                         | TS = Determinants  | 370,301    |
| #37                                                                                                         | TS = Factors       | 7,528,409  |
| #38                                                                                                         | TS = Influences    | 3,876,183  |
| #39                                                                                                         | #36 OR #37 OR #38  | 10,555,251 |
| #40                                                                                                         | #3 AND #35 AND #39 | 779        |

TS means 'theme' or 'subject' and used for indexing articles for Web of Science.

## 2. The Extracted Determinants

Table S4. 50 determinants

| Group | Category                                | Determinant                                                                                                                                                                                                                                                                                                                                                                                                                                                                                                                                                                                                                        |
|-------|-----------------------------------------|------------------------------------------------------------------------------------------------------------------------------------------------------------------------------------------------------------------------------------------------------------------------------------------------------------------------------------------------------------------------------------------------------------------------------------------------------------------------------------------------------------------------------------------------------------------------------------------------------------------------------------|
| A     | Healthcare worker-related factors       | A1-gender, A2-age, A3-years of experience, A4-education level, A5-professional title, A6-department, A7-hospital type, A8-region, A9-income, A10-income satisfaction, A11-working time per day, A12-marital status, A13-employment form, A14-administrative position, A15-whether disputed with patient, A16-workload, A17-medical ethics, A18-whether medical disputes interfere with work, A19-career satisfaction, A20-ability to handle dispute, A21-whether worry about encountering dispute, A22-daily average rate of outpatient visits, A23-medical liability insurance, A24-time spent in direct contact with the patient |
| B     | Patient-related factors                 | B1-gender, B2-age, A3-registered residence, B4-education level, B5-occupation, B6-medical insurance, B7-medical expenses, B8-household income, B9-whether have a familiar doctor, B10-hospital type, B11-region, B12-department, B13-whether first visit, B14-registration, B15-sources of patients, B16-whether have family doctors, B17-referral, B18-operation                                                                                                                                                                                                                                                                  |
| C     | Therapeutic interaction-related factors | C1-health worker-patient trust, C2-service attitude, C3-service quality and level, C4-treatment effect, C5-whether health worker receives kickbacks on medications or medical devices, C6-whether adequate medical information is shared, C7-Health worker-patient communication, C8-whether patient bribes or entertains doctors                                                                                                                                                                                                                                                                                                  |

### 3. The Distribution of Determinants

**Table S5.** Distribution of Determinants in 11 Included Studies (1 = Yes, space = No)

[illegible]

|       |    |   |   |   |   |    |   |    |   |    |   |   |     |
|-------|----|---|---|---|---|----|---|----|---|----|---|---|-----|
| B1    |    |   |   |   |   | 1  |   | 1  |   |    | 1 |   | 3   |
| B2    |    |   |   |   |   | 1  |   | 1  | 1 |    | 1 |   | 4   |
| B3    |    |   |   |   |   | 1  |   | 1  |   |    | 1 |   | 3   |
| B4    |    |   |   |   |   | 1  |   | 1  | 1 |    | 1 | 1 | 5   |
| B5    |    |   |   |   |   |    |   | 1  |   |    |   |   | 1   |
| B6    |    |   |   |   |   | 1  |   | 1  | 1 |    | 1 | 1 | 5   |
| B7    |    |   |   |   |   |    | 1 | 1  |   |    |   |   | 2   |
| B8    |    |   |   |   |   | 1  |   |    |   |    | 1 |   | 2   |
| B9    |    |   |   |   |   | 1  | 1 |    |   |    |   |   | 2   |
| B10   |    |   |   |   |   | 1  |   |    |   |    |   |   | 1   |
| B11   |    |   |   |   |   | 1  |   |    |   |    |   |   | 1   |
| B12   |    |   |   |   |   | 1  |   |    |   |    |   |   | 1   |
| B13   |    |   |   |   |   | 1  |   |    |   |    |   |   | 1   |
| B14   |    |   |   |   |   | 1  |   |    |   |    |   |   | 1   |
| B15   |    |   |   |   |   | 1  |   |    |   |    |   |   | 1   |
| B16   |    |   |   |   |   | 1  |   |    |   |    |   |   | 1   |
| B17   |    |   |   |   |   | 1  |   |    |   |    |   |   | 1   |
| B18   |    |   |   |   |   |    |   | 1  |   |    |   |   | 1   |
| C1    | 1  |   |   |   |   |    | 1 |    | 1 |    |   |   | 3   |
| C2    |    |   |   |   |   |    | 1 | 1  |   |    |   |   | 2   |
| C3    |    |   |   |   |   |    | 1 |    |   |    |   |   | 1   |
| C4    |    |   |   |   |   |    | 1 |    |   |    |   |   | 1   |
| C5    |    |   |   |   |   |    | 1 |    |   |    |   |   | 1   |
| C6    |    |   |   |   |   |    | 1 |    |   |    |   |   | 1   |
| C7    |    |   |   |   |   |    |   |    | 1 |    |   |   | 1   |
| C8    |    |   |   |   |   |    |   | 1  |   |    |   |   | 1   |
| Total | 11 | 8 | 9 | 9 | 7 | 15 | 9 | 16 | 5 | 11 | 2 |   | 102 |

## 4. The Extracted Data

### Data Extraction According to Each Determinant

#### PERSPECTIVE OF HEALTH WORKER

Table S6. A1-Gender

| Author     | Group  | No Dispute/<br>Harmony | Dispute/<br>Tension | Results                                                              |
|------------|--------|------------------------|---------------------|----------------------------------------------------------------------|
| Wang, 2015 | Male   | 256                    | 117                 | No significant difference<br>( $\chi^2$ test = 1.637, $p$ = 0.201)   |
|            | Female | 156                    | 89                  |                                                                      |
| Liu, 2018  | Male   | 6552                   | 11,848              | Significant difference<br>( $\chi^2$ test- $p$ <0.05)                |
|            | Female | 32,540                 | 37,232              |                                                                      |
| Deng, 2010 | Male   | 21                     | 1                   | No significant difference<br>( $\chi^2$ test- $p$ >0.05)             |
|            | Female | 24                     | 3                   |                                                                      |
| Shi, 2017  | Male   | 298                    | 456                 | No significant difference<br>( $\chi^2$ test- $p$ >0.05)             |
|            | Female | 10,638                 | 20,548              |                                                                      |
| Yuan, 2017 | Male   | 594                    | 1009                | No significant difference<br>( $\chi^2$ test = 0.1041, $p$ = 0.7469) |
|            | Female | 735                    | 1325                |                                                                      |

Table S7. A2-Age

| Author     | Group   | No Dispute/<br>Harmony | Dispute/<br>Tension | Results                                                            |
|------------|---------|------------------------|---------------------|--------------------------------------------------------------------|
| Wang, 2015 | <35     | 115                    | 63                  | No significant difference<br>( $\chi^2$ test = 3.378, $p$ = 0.185) |
|            | 35–45   | 232                    | 101                 |                                                                    |
|            | >45     | 65                     | 42                  |                                                                    |
| Liu, 2018  | ≤35     | 13,363                 | 9343                | Significant difference<br>( $\chi^2$ test- $p$ <0.05)              |
|            | 36–50   | 5125                   | 7877                |                                                                    |
|            | ≥51     | 1058                   | 1320                |                                                                    |
|            | missing | 6,000                  |                     |                                                                    |
| Deng, 2010 | <40     | 43                     | 4                   | No significant difference<br>( $\chi^2$ test- $p$ >0.05)           |
|            | >40     | 2                      | 0                   |                                                                    |
| Shi, 2017  | ≤30     | 3202                   | 5962                | Significant difference<br>( $\chi^2$ test- $p$ <0.001)             |
|            | 31–50   | 2086                   | 4310                |                                                                    |
|            | ≥51     | 180                    | 230                 |                                                                    |
| Yuan, 2017 | ≤20     | 37                     | 92                  | No significant difference<br>( $\chi^2$ test = 8.936, $p$ = 0.063) |
|            | 20–30   | 533                    | 956                 |                                                                    |
|            | 30–40   | 391                    | 830                 |                                                                    |
|            | 40–50   | 265                    | 369                 |                                                                    |
|            | >50     | 85                     | 105                 |                                                                    |



Table S8. A3-Years of Experience

| Author     | Group     | No Dispute/<br>Harmony | Dispute/<br>Tension | Results                                                            |
|------------|-----------|------------------------|---------------------|--------------------------------------------------------------------|
| Wang, 2015 | <10       | 132                    | 69                  | No significant difference<br>( $\chi^2$ test = 8.936, $p$ = 0.063) |
|            | 10–20     | 227                    | 102                 |                                                                    |
|            | >20       | 53                     | 35                  |                                                                    |
| Shi, 2017  | 1–4       | 2488                   | 4147                | Significant difference<br>( $\chi^2$ test- $p$ <0.001)             |
|            | 5–10      | 1332                   | 3068                |                                                                    |
|            | 11–20     | 814                    | 1819                |                                                                    |
|            | $\geq 21$ | 834                    | 1468                |                                                                    |
| Yuan, 2017 | <5        | 405                    | 659                 | Significant difference<br>( $\chi^2$ test = 9.8704, $p$ = 0.0197)  |
|            | 5–9       | 205                    | 462                 |                                                                    |
|            | 10–15     | 102                    | 194                 |                                                                    |
|            | >15       | 233                    | 414                 |                                                                    |

Table S9. A4-Education Level

| Author     | Group                       | No Dispute/<br>Harmony | Dispute/<br>Tension | Results                                                            |
|------------|-----------------------------|------------------------|---------------------|--------------------------------------------------------------------|
| Zhao, 2017 | Master or above             | 15                     | 72                  | Significant difference<br>( $\chi^2$ test=15.270, $p$ <0.05)       |
|            | Undergraduate               | 51                     | 307                 |                                                                    |
|            | Junior college              | 22                     | 47                  |                                                                    |
|            | Senior high school or below | 4                      | 2                   |                                                                    |
| Wang, 2015 | Undergraduate               | 142                    | 72                  | No significant difference<br>( $\chi^2$ test = 0.294, $p$ = 0.863) |
|            | Master                      | 222                    | 113                 |                                                                    |
|            | Doctor                      | 48                     | 21                  |                                                                    |
| Gao, 2015  | Junior college or below     | 2                      | 8                   | Significant difference<br>( $\chi^2$ test = 42.615, $p$ = 0.000)   |
|            | Undergraduate               | 10                     | 114                 |                                                                    |
|            | Master or above             | 16                     | 10                  |                                                                    |
| Deng, 2010 | Undergraduate               | 36                     | 2                   | Significant difference<br>( $\chi^2$ test- $p$ <0.05)              |
|            | Master                      | 4                      | 2                   |                                                                    |
|            | Doctor                      | 5                      | 0                   |                                                                    |
| Shi, 2017  | Below undergraduate         | 2625                   | 4665                | Significant difference<br>( $\chi^2$ test- $p$ <0.05)              |
|            | Undergraduate               | 2803                   | 5770                |                                                                    |
|            | Master's or above           | 40                     | 67                  |                                                                    |
| Yuan, 2017 | Junior college or below     | 122                    | 237                 | Significant difference<br>( $\chi^2$ test = 15.751, $p$ = 0.001)   |
|            | Undergraduate               | 527                    | 1091                |                                                                    |
|            | Master or above             | 299                    | 404                 |                                                                    |

Table S10. A5-Professional Title

| Author     | Group  | No Dispute/<br>Harmony | Dispute/<br>Tension | Results               |
|------------|--------|------------------------|---------------------|-----------------------|
| Zhao, 2017 | Senior | 12                     | 69                  | Significant deference |

|            |                         |        |        |                                                                                                                                                                                                 |
|------------|-------------------------|--------|--------|-------------------------------------------------------------------------------------------------------------------------------------------------------------------------------------------------|
|            | Intermediate            | 45     | 133    | $(\chi^2 \text{ test} = 13.107, p < 0.05)$                                                                                                                                                      |
|            | Junior                  | 55     | 164    |                                                                                                                                                                                                 |
|            | None professional title | 19     | 23     |                                                                                                                                                                                                 |
| Wang, 2015 | Junior                  | 136    | 68     | No significant difference<br>$(\chi^2 \text{ test} = 1.832, p = 0.400)$                                                                                                                         |
|            | Intermediate            | 231    | 108    |                                                                                                                                                                                                 |
|            | Senior                  | 45     | 30     |                                                                                                                                                                                                 |
| Gao, 2015  | Junior                  | 12     | 68     | No significant difference<br>$(\chi^2 \text{ test} = 3.628, p = 0.163)$                                                                                                                         |
|            | Intermediate            | 9      | 49     |                                                                                                                                                                                                 |
|            | Senior                  | 7      | 15     |                                                                                                                                                                                                 |
| Liu, 2018  | Junior                  | 11,350 | 11,862 | Significant difference<br>$(\chi^2 \text{ test} = 13.107, p < 0.05)$<br>Intermediate vs. Junior<br>(OR = 0.886, 95%CI: 0.814–0.965)                                                             |
|            | Intermediate            | 5392   | 8001   |                                                                                                                                                                                                 |
|            | Senior                  | 2804   | 4677   |                                                                                                                                                                                                 |
| Deng, 2010 | Junior                  | 17     | 4      | Significant difference<br>$(\chi^2 \text{ test} = 8.376, p = 0.016)$                                                                                                                            |
|            | Intermediate            | 15     | 0      |                                                                                                                                                                                                 |
|            | Senior                  | 13     | 0      |                                                                                                                                                                                                 |
| Shi, 2017  | Junior                  | 3855   | 7239   | Significant difference in the tertiary hospitals<br>$(\chi^2 \text{ test} = 6.6, p < 0.05)$ ;<br>No significant difference in county-level hospitals<br>$(\chi^2 \text{ test} = 1.5, p > 0.05)$ |
|            | Intermediate            | 1154   | 2675   |                                                                                                                                                                                                 |
|            | Senior                  | 359    | 688    |                                                                                                                                                                                                 |
| Yuan, 2017 | Junior                  | 560    | 1063   | Significant difference<br>$(\chi^2 \text{ test} = 20.468, p = 0.000)$                                                                                                                           |
|            | Intermediate            | 197    | 422    |                                                                                                                                                                                                 |
|            | Senior                  | 178    | 216    |                                                                                                                                                                                                 |

**Table S11.** A6-Department

| Author     | Group                        | No Dispute/<br>Harmony | Dispute/<br>Tension | Results                                                                                                                        |
|------------|------------------------------|------------------------|---------------------|--------------------------------------------------------------------------------------------------------------------------------|
| Liu, 2018  | Internal medicine            | 4641                   | 5859                | Significant difference<br>$(\chi^2 \text{ test-} p < 0.05)$<br>Internal medicine vs. Other (OR = 0.871, 95%CI:0.798–0.952)     |
|            | Surgery                      | 3837                   | 4182                |                                                                                                                                |
|            | Gynaecology and obstetrics   | 2990                   | 3510                |                                                                                                                                |
|            | Paediatrics                  | 1521                   | 2335                |                                                                                                                                |
|            | Emergency                    | 699                    | 1038                |                                                                                                                                |
|            | Traditional Chinese Medicine | 321                    | 445                 |                                                                                                                                |
|            | Other                        | 5537                   | 7171                |                                                                                                                                |
| Deng, 2010 | Surgery                      | 26                     | 4                   | Significant difference<br>$(\chi^2 \text{ test-} p < 0.05)$                                                                    |
|            | non-surgical department      | 19                     | 0                   |                                                                                                                                |
| Shi, 2017  | Emergency                    | 189                    | 847                 | Significant difference<br>$(\chi^2 \text{ test-} p < 0.001)$<br>Surgery in tertiary hospitals vs. Other department in tertiary |
|            | Internal medicine            | 1629                   | 3183                |                                                                                                                                |
|            | Surgery                      | 1068                   | 2221                |                                                                                                                                |
|            | Gynaecology and obstetrics   | 361                    | 675                 |                                                                                                                                |
|            | Paediatrics                  | 309                    | 834                 |                                                                                                                                |
|            | Other                        | 1912                   | 2742                |                                                                                                                                |

|            |                            |     |     |                                                                                                                                   |
|------------|----------------------------|-----|-----|-----------------------------------------------------------------------------------------------------------------------------------|
|            |                            |     |     | hospitals (OR = 1.341, 95%CI: 1.187–1.514)                                                                                        |
| Yuan, 2017 | Outpatient Emergency       | 19  | 60  | Significant difference ( $\chi^2$ test = 98.409, $p$ = 0.0000)<br>Internal medicine vs. Outpatient (OR = 0.540, 95%CI: 0.30–0.98) |
|            | Internal medicine          | 19  | 168 |                                                                                                                                   |
|            | Surgery                    | 376 | 626 |                                                                                                                                   |
|            | Gynaecology and obstetrics | 218 | 453 |                                                                                                                                   |
|            | Paediatrics                | 69  | 94  |                                                                                                                                   |
|            | Ophthalmology&             | 27  | 48  |                                                                                                                                   |
|            | Otorhinolaryngology        | 22  | 56  |                                                                                                                                   |
|            | ICU                        | 21  | 32  |                                                                                                                                   |
|            | Other                      | 175 | 176 |                                                                                                                                   |

Table S12. A7-Hospital Type

| Author    | Group                                     | No Dispute/<br>Harmony | Dispute/<br>Tension | Results                                                                                                   |
|-----------|-------------------------------------------|------------------------|---------------------|-----------------------------------------------------------------------------------------------------------|
| Liu, 2018 | The general hospital                      | 8858                   | 10,781              | Significant difference ( $\chi^2$ test- $p$ <0.05)                                                        |
|           | The traditional Chinese medicine hospital | 4302                   | 5349                | The traditional Chinese medicine hospital vs. Other specialized hospitals (OR = 1.257, 95%CI:1.096–1.441) |
|           | The women and childrens hospital          | 4253                   | 5417                |                                                                                                           |
|           | Other specialized hospitals               | 2133                   | 2993                |                                                                                                           |

Table S13. A8-Region

| Author    | Group              | No Dispute/<br>Harmony | Dispute/<br>Tension | Results                                                                    |
|-----------|--------------------|------------------------|---------------------|----------------------------------------------------------------------------|
| Liu, 2018 | The eastern region | 8394                   | 10,371              | Significant difference ( $\chi^2$ test- $p$ <0.05)                         |
|           | The central region | 4565                   | 5362                | The western region vs. The western region (OR = 1.126, 95%CI: 1.035–1.224) |
|           | The western region | 6587                   | 8807                |                                                                            |

Table S14. A9-Income

| Author    | Group                         | No Dispute/<br>Harmony | Dispute/<br>Tension | Results                                                                 |
|-----------|-------------------------------|------------------------|---------------------|-------------------------------------------------------------------------|
| Liu, 2018 | <120,000 Yuan per year        | 15,784                 | 18,771              | Significant difference ( $\chi^2$ test- $p$ <0.05)                      |
|           | 120,000–240,000 Yuan per year | 2969                   | 4600                | 120,000–240,000 Yuan vs. <120,000 Yuan (OR = 1.186, 95%CI: 1.079–1.304) |
|           | >240,000 Yuan per year        | 793                    | 1169                |                                                                         |
|           |                               |                        |                     |                                                                         |
| Shi, 2017 | ≤3000 Yuan per month          | 2970                   | 5693                | No significant difference ( $\chi^2$ test- $p$ >0.05)                   |
|           | 3000–5000 Yuan per month      | 2176                   | 4186                |                                                                         |
|           | 5000–10 000 Yuan per month    | 311                    | 603                 |                                                                         |
|           | >10 000 Yuan per month        | 11                     | 20                  |                                                                         |

|            |                          |     |     |                                                                    |
|------------|--------------------------|-----|-----|--------------------------------------------------------------------|
| Yuan, 2017 | <2000 Yuan per month     | 303 | 570 | No significant difference<br>( $\chi^2$ test = 7.454, $p$ = 0.059) |
|            | 2000–3999 Yuan per month | 487 | 917 |                                                                    |
|            | 4000–6000 Yuan per month | 132 | 202 |                                                                    |
|            | >6000 Yuan per month     | 20  | 19  |                                                                    |

**Table S15.** A10-Income Satisfaction

| Author     | Group        | No Dispute/<br>Harmony | Dispute/<br>Tension | Results                                               |
|------------|--------------|------------------------|---------------------|-------------------------------------------------------|
| Zhao, 2017 | dissatisfied | 69                     | 187                 | Significant difference<br>( $\chi^2$ test- $p$ <0.05) |
|            | satisfied    | 45                     | 219                 |                                                       |

**Table S16.** A11-Working Time Per Day

| Author    | Group       | No Dispute/<br>Harmony | Dispute/<br>Tension | Results                                                          |
|-----------|-------------|------------------------|---------------------|------------------------------------------------------------------|
| Gao, 2015 | <8 hours    | 3                      | 11                  | Significant difference<br>( $\chi^2$ test = 38.221, $p$ = 0.000) |
|           | 8–10 hours  | 21                     | 25                  |                                                                  |
|           | 10–12 hours | 3                      | 51                  |                                                                  |
|           | >12 hours   | 1                      | 45                  |                                                                  |
| Shi, 2017 | 0–2 hours   | 97                     | 119                 | Significant difference<br>( $p$ < 0.05)                          |
|           | 2–4 hours   | 149                    | 223                 |                                                                  |
|           | 4–6 hours   | 159                    | 218                 |                                                                  |
|           | 6–8 hours   | 2492                   | 4308                |                                                                  |
|           | >8 hours    | 2571                   | 5634                |                                                                  |

**Table S17.** A12-Marital Status

| Author     | Group               | No Dispute/<br>Harmony | Dispute/<br>Tension | Results                                                                                |
|------------|---------------------|------------------------|---------------------|----------------------------------------------------------------------------------------|
| Shi, 2017  | Married             | 3274                   | 6697                | Significant difference<br>in tertiary hospitals<br>( $\chi^2$ test = 27.8, $p$ <0.001) |
|            | Unmarried           | 2111                   | 3646                |                                                                                        |
|            | Divorced or widowed | 83                     | 159                 |                                                                                        |
| Yuan, 2017 | Married             | 246                    | 418                 | No significant difference<br>( $\chi^2$ test = 1.039, $p$ = 0.3081)                    |
|            | Unmarried           | 698                    | 1304                |                                                                                        |

**Table S18.** A13-Employment Form

| Author     | Group                        | No Dispute/<br>Harmony | Dispute/<br>Tension | Results                                                          |
|------------|------------------------------|------------------------|---------------------|------------------------------------------------------------------|
| Shi, 2017  | Regular staff                | 2913                   | 5503                | No significant difference<br>( $\chi^2$ test- $p$ > 0.05)        |
|            | Temporary employee           | 2555                   | 4999                |                                                                  |
| Yuan, 2017 | Officially enrolled employee | 494                    | 845                 | Significant difference<br>( $\chi^2$ test = 11.967, $p$ < 0.008) |
|            | Contract employee            | 379                    | 782                 |                                                                  |
|            | Temporary employee           | 35                     | 67                  |                                                                  |
|            | Other                        | 30                     | 28                  |                                                                  |

Table S19. A14-Administrative Position

| Author    | Group | No Dispute/<br>Harmony | Dispute/<br>Tension | Results                                                                                                  |
|-----------|-------|------------------------|---------------------|----------------------------------------------------------------------------------------------------------|
| Liu, 2018 | Yes   | 2,290                  | 2670                | Significant difference<br>( $\chi^2$ test- $p < 0.05$ )<br>Yes vs. No (OR = 1.326,<br>95%CI:1.195–1.471) |
|           | No    | 17,256                 | 21,870              |                                                                                                          |

Table S20. A15-Whether Disputed with Patient

| Author     | Group | No Dispute/<br>Harmony | Dispute/<br>Tension | Results                                                                  |
|------------|-------|------------------------|---------------------|--------------------------------------------------------------------------|
| Zhao, 2017 | Yes   | 85                     | 369                 | Significant difference<br>( $\chi^2$ test- $p < 0.05$ )                  |
|            | No    | 24                     | 42                  |                                                                          |
| Gao, 2015  | Yes   | 23                     | 97                  | No significant<br>difference<br>( $\chi^2$ test = 0.924, $p =$<br>0.337) |
|            | No    | 5                      | 35                  |                                                                          |

Table S21. A16-Workload

| Author     | Group | No Dispute/<br>Harmony | Dispute/<br>Tension | Results                                                            |
|------------|-------|------------------------|---------------------|--------------------------------------------------------------------|
| Zhao, 2017 | Heavy | 81                     | 367                 | Significant difference<br>( $\chi^2$ test- $p < 0.05$ )            |
|            | Light | 21                     | 51                  |                                                                    |
| Gao, 2015  | Heavy | 15                     | 107                 | Significant difference<br>( $\chi^2$ test = 9.629, $p =$<br>0.002) |
|            | Light | 13                     | 25                  |                                                                    |

Table S22. A17-Medical Ethics

| Author     | Group | No Dispute/<br>Harmony | Dispute/<br>Tension | Results                                                 |
|------------|-------|------------------------|---------------------|---------------------------------------------------------|
| Zhao, 2017 | Good  | 72                     | 140                 | Significant difference<br>( $\chi^2$ test- $p < 0.05$ ) |
|            | Poor  | 31                     | 277                 |                                                         |

Table S23. A18-Whether Medical Disputes Interfere with Work

| Author     | Group | No Dispute/<br>Harmony | Dispute/<br>Tension | Results                                                 |
|------------|-------|------------------------|---------------------|---------------------------------------------------------|
| Zhao, 2017 | Yes   | 88                     | 326                 | Significant difference<br>( $\chi^2$ test- $p < 0.05$ ) |
|            | No    | 35                     | 71                  |                                                         |

Table S24. A19-Career Satisfaction

| Author | Group | No Dispute/<br>Harmony | Dispute/<br>Tension | Results |
|--------|-------|------------------------|---------------------|---------|
|--------|-------|------------------------|---------------------|---------|

|            |       |     |     |                                                                    |
|------------|-------|-----|-----|--------------------------------------------------------------------|
| Wang, 2015 | >80   | 45  | 33  | No significant difference<br>( $\chi^2$ test = 3.236, $p$ = 0.198) |
|            | 60-80 | 238 | 112 |                                                                    |
|            | <60   | 129 | 61  |                                                                    |

**Table S25.** A20-Ability to Handle Dispute

| Author     | Group | No Dispute/<br>Harmony | Dispute/<br>Tension | Results                                                            |
|------------|-------|------------------------|---------------------|--------------------------------------------------------------------|
| Wang, 2015 | Good  | 367                    | 173                 | No significant difference<br>( $\chi^2$ test = 3.235, $p$ = 0.072) |
|            | Poor  | 45                     | 33                  |                                                                    |

**Table S26.** A21-Whether Worry about Encountering Dispute

| Author    | Group | No Dispute/<br>Harmony | Dispute/<br>Tension | Results                                                          |
|-----------|-------|------------------------|---------------------|------------------------------------------------------------------|
| Gao, 2015 | Yes   | 18                     | 132                 | Significant difference<br>( $\chi^2$ test = 50.286, $p$ = 0.000) |
|           | No    | 10                     | 0                   |                                                                  |

**Table S27.** A22-Daily Average Rate of Outpatient Visits

| Author    | Group | No Dispute/<br>Harmony | Dispute/<br>Tension | Results                                                          |
|-----------|-------|------------------------|---------------------|------------------------------------------------------------------|
| Gao, 2015 | 3–5   | 1                      | 14                  | Significant difference<br>( $\chi^2$ test = 12.231, $p$ = 0.007) |
|           | 5–7   | 7                      | 7                   |                                                                  |
|           | 7–9   | 1                      | 10                  |                                                                  |
|           | ≥10   | 19                     | 101                 |                                                                  |

**Table S28.** A23-Medical Liability Insurance

| Author    | Group   | No Dispute/<br>Harmony | Dispute/<br>Tension | Results                                                                                                  |
|-----------|---------|------------------------|---------------------|----------------------------------------------------------------------------------------------------------|
| Liu, 2018 | Yes     | 12,994                 | 11,118              | Significant difference<br>( $\chi^2$ test- $p$ < 0.05)<br>Yes vs. No (OR = 2.193,<br>95%CI: 2.066–2.327) |
|           | No      | 1742                   | 3450                |                                                                                                          |
|           | Unclear | 4810                   | 9972                |                                                                                                          |

**Table S29.** A24-Time Spent in Direct Contact with the Patient

| Author    | Group     | No Dispute/<br>Harmony | Dispute/<br>Tension | Results                                                 |
|-----------|-----------|------------------------|---------------------|---------------------------------------------------------|
| Shi, 2017 | 0–2 hours | 162                    | 124                 | Significant difference<br>( $\chi^2$ test- $p$ < 0.001) |
|           | 2–4 hours | 217                    | 271                 |                                                         |
|           | 4–6 hours | 518                    | 804                 |                                                         |
|           | 6–8 hours | 4571                   | 9303                |                                                         |

## PERSPECTIVE OF PATIENT

Table S30. B1-Gender

| Author     | Group  | No Dispute/<br>Harmony | Dispute/<br>Tension | Results                                                               |
|------------|--------|------------------------|---------------------|-----------------------------------------------------------------------|
| Wang, 2015 | Male   | 196                    | 109                 | No significant<br>difference<br>( $\chi^2$ test = 1.566, $p$ = 0.211) |
|            | Female | 216                    | 97                  |                                                                       |
| Deng, 2010 | Male   | 37                     | 44                  | No significant<br>difference<br>( $\chi^2$ test = 1.238, $p$ = 0.539) |
|            | Female | 23                     | 36                  |                                                                       |
| Zhao, 2018 | Male   | 6701                   | 2789                | No significant<br>difference<br>( $\chi^2$ test = 3.140, $p$ = 0.080) |
|            | Female | 13,651                 | 5964                |                                                                       |

Table S31. B2-Age

| Author     | Group | No Dispute/<br>Harmony | Dispute/<br>Tension | Results                                                                |
|------------|-------|------------------------|---------------------|------------------------------------------------------------------------|
| Wang, 2015 | <18   | 38                     | 21                  | No significant<br>difference<br>( $\chi^2$ test = 1.536, $p$ = 0.464)  |
|            | 18–60 | 246                    | 110                 |                                                                        |
|            | >60   | 128                    | 71                  |                                                                        |
| Deng, 2010 | <20   | 3                      | 2                   | No significant<br>difference<br>( $\chi^2$ test = 10.882, $p$ = 0.094) |
|            | 20–39 | 40                     | 43                  |                                                                        |
|            | 40–59 | 11                     | 22                  |                                                                        |
|            | >60   | 6                      | 13                  |                                                                        |
| Zhao, 2018 | <35   | 10,529                 | 4569                | No significant<br>difference<br>( $\chi^2$ test = 0.86, $p$ = 0.65)    |
|            | 35–65 | 8159                   | 3492                |                                                                        |
|            | >65   | 1664                   | 692                 |                                                                        |
| Yang, 2014 | ≤19   | 92                     | 21                  | Significant difference<br>( $\chi^2$ test = 22.875, $p$ = 0.000)       |
|            | 20–39 | 676                    | 131                 |                                                                        |
|            | 40–59 | 448                    | 42                  |                                                                        |
|            | ≥60   | 120                    | 9                   |                                                                        |

Table S32. B3-Registered Residence

| Author     | Group | No Dispute/<br>Harmony | Dispute/<br>Tension | Results                                                               |
|------------|-------|------------------------|---------------------|-----------------------------------------------------------------------|
| Wang, 2015 | Urban | 153                    | 62                  | No significant<br>difference<br>( $\chi^2$ test = 2.999, $p$ = 0.083) |
|            | Rural | 259                    | 144                 |                                                                       |
| Deng, 2010 | Urban | 13                     | 45                  | Significant difference<br>( $\chi^2$ test = 17.096, $p$ = 0.000)      |
|            | Rural | 47                     | 35                  |                                                                       |
| Zhao, 2018 | Urban | 14,538                 | 6085                | Significant difference                                                |

|       |       |       |                                     |
|-------|-------|-------|-------------------------------------|
| Rural | 5,814 | 2,668 | ( $\chi^2$ test= 10.860, $p<0.01$ ) |
|-------|-------|-------|-------------------------------------|

**Table S33. B4-Education Level**

| Author     | Group                       | No Dispute/<br>Harmony | Dispute/<br>Tension | Results                                                          |
|------------|-----------------------------|------------------------|---------------------|------------------------------------------------------------------|
| Wang, 2015 | Primary school or below     | 165                    | 103                 | Significant difference<br>( $\chi^2$ test = 7.355, $p$ = 0.025)  |
|            | Junior middle school        | 131                    | 63                  |                                                                  |
|            | High school or above        | 116                    | 40                  |                                                                  |
| Deng, 2010 | Primary school              | 8                      | 8                   | Significant difference<br>( $\chi^2$ test = 30.254, $p$ = 0.000) |
|            | Junior middle school        | 31                     | 15                  |                                                                  |
|            | High school                 | 14                     | 30                  |                                                                  |
|            | Junior college              | 5                      | 10                  |                                                                  |
|            | Undergraduate or above      | 2                      | 17                  |                                                                  |
| Zhao, 2018 | Junior high school or below | 4194                   | 1434                | Significant difference<br>( $\chi^2$ test = 132.13, $p<0.01$ )   |
|            | Senior high school          | 5351                   | 2050                |                                                                  |
|            | Undergraduate or above      | 10,807                 | 5269                |                                                                  |
| Liu, 2010  | Junior college or below     | 956                    | 258                 | Significant difference<br>( $\chi^2$ test = 7.725, $p$ = 0.021)  |
|            | Undergraduate               | 224                    | 43                  |                                                                  |
|            | Master or above             | 31                     | 2                   |                                                                  |
| Yang, 2014 | Illiteracy                  | 49                     | 5                   | Significant difference<br>( $\chi^2$ test = 19.001, $p$ = 0.004) |
|            | Primary school              | 115                    | 17                  |                                                                  |
|            | Junior middle school        | 492                    | 60                  |                                                                  |
|            | Polytechnic school          | 158                    | 22                  |                                                                  |
|            | High school                 | 271                    | 39                  |                                                                  |
|            | Junior college              | 136                    | 24                  |                                                                  |
|            | Undergraduate or above      | 115                    | 36                  |                                                                  |

**Table S34. B5-Occupation**

| Author     | Group                   | No Dispute/<br>Harmony | Dispute/<br>Tension | Results                                                         |
|------------|-------------------------|------------------------|---------------------|-----------------------------------------------------------------|
| Wang, 2015 | No regular occupation   | 229                    | 137                 | Significant difference<br>( $\chi^2$ test = 6.838, $p$ = 0.032) |
|            | Student                 | 45                     | 18                  |                                                                 |
|            | Have regular occupation | 138                    | 51                  |                                                                 |

**Table S35. B6-Medical Insurance**

| Author     | Group                                 | No Dispute/<br>Harmony | Dispute/<br>Tension | Results                                                         |
|------------|---------------------------------------|------------------------|---------------------|-----------------------------------------------------------------|
| Wang, 2015 | None                                  | 34                     | 26                  | Significant difference<br>( $\chi^2$ test = 7.100, $p$ = 0.029) |
|            | New rural cooperative medical system  | 240                    | 98                  |                                                                 |
|            | Other medical insurance               | 138                    | 82                  |                                                                 |
| Deng, 2010 | Medical insurance for Urban residents | 2,635                  | 1242                | Significant difference<br>( $\chi^2$ test = 35.100, $p<0.01$ )  |
|            | Medical insurance for urban employees | 2,482                  | 884                 |                                                                 |
|            | New rural cooperative medical system  | 6188                   | 2743                |                                                                 |
|            | Commercial medical insurance          | 8716                   | 3717                |                                                                 |
| Liu, 2010  | None                                  | 331                    | 167                 | Significant difference                                          |
|            | No                                    | 470                    | 153                 |                                                                 |



|            |                                       |     |     |                                                                  |
|------------|---------------------------------------|-----|-----|------------------------------------------------------------------|
|            | Yes                                   | 741 | 150 | ( $\chi^2$ test- $p < 0.05$ )                                    |
| Yang, 2014 | Medical insurance for urban employees | 285 | 39  | Significant difference<br>( $\chi^2$ test = 11.364, $p = 0.01$ ) |
|            | Medical insurance for Urban residents | 192 | 31  |                                                                  |
|            | New rural cooperative medical system  | 821 | 118 |                                                                  |
|            | Other medical insurance               | 38  | 15  |                                                                  |

**Table S36. B7-Medical Expenses**

| Author      | Group             | No Dispute/<br>Harmony | Dispute/<br>Tension | Results                                                           |
|-------------|-------------------|------------------------|---------------------|-------------------------------------------------------------------|
| Zhang, 2011 | Very satisfied    | 28                     | 17                  | Significant difference<br>( $\chi^2$ test = 38.110, $p = 0.000$ ) |
|             | Satisfied         | 152                    | 87                  |                                                                   |
|             | General           | 77                     | 98                  |                                                                   |
|             | Dissatisfied      | 6                      | 31                  |                                                                   |
|             | Very dissatisfied | 1                      | 1                   |                                                                   |
| Wang, 2015  | <5000 Yuan        | 28                     | 15                  | Significant difference<br>( $\chi^2$ test = 9.671, $p = 0.022$ )  |
|             | 5000–10000 Yuan   | 81                     | 38                  |                                                                   |
|             | 10000–20000 Yuan  | 214                    | 90                  |                                                                   |
|             | >20000 Yuan       | 79                     | 63                  |                                                                   |

**Table S37. B8-Household Income**

| Author     | Group                      | No Dispute/<br>Harmony | Dispute/<br>Tension | Results                                                                                                                          |
|------------|----------------------------|------------------------|---------------------|----------------------------------------------------------------------------------------------------------------------------------|
| Deng, 2010 | <800 Yuan per month        | 34                     | 23                  | Significant difference<br>( $\chi^2$ test = 17.037, $p = 0.009$ )                                                                |
|            | 800–2000 Yuan per month    | 20                     | 28                  |                                                                                                                                  |
|            | 2000–3000 Yuan per month   | 4                      | 16                  |                                                                                                                                  |
|            | >3000 Yuan per month       | 2                      | 13                  |                                                                                                                                  |
| Zhao, 2018 | <60000 Yuan per year       | 12,639                 | 5109                | Significant difference<br>( $\chi^2$ test = 37.52, $p < 0.01$ )<br>>120000 Yuan vs.<br><60000 Yuan (OR = 0.83, 95%CI: 0.75–0.91) |
|            | 60000–120000 Yuan per year | 4586                   | 2121                |                                                                                                                                  |
|            | >120000 Yuan per year      | 3127                   | 1523                |                                                                                                                                  |

**Table S38. B9-Whether Have a Familiar Doctor**

| Author      | Group | No Dispute/<br>Harmony | Dispute/<br>Tension | Results                                                                                                      |
|-------------|-------|------------------------|---------------------|--------------------------------------------------------------------------------------------------------------|
| Zhao, 2018  | Yes   | 6777                   | 2351                | Significant difference<br>( $\chi^2$ test = 117.91, $p < 0.01$ )<br>Yes vs. No (OR = 0.88, 95%CI: 0.82–0.95) |
|             | No    | 13,575                 | 6402                |                                                                                                              |
| Zhang, 2011 | Yes   | 153                    | 99                  | Significant difference<br>( $\chi^2$ test = 12.15, $p = 0.000$ )                                             |
|             | No    | 111                    | 135                 |                                                                                                              |

**Table S39. B10-Hospital Type**

| Author | Group | No Dispute/<br>Harmony | Dispute/<br>Tension | Results |
|--------|-------|------------------------|---------------------|---------|
|--------|-------|------------------------|---------------------|---------|

|            |                                           |      |      |                                                                 |
|------------|-------------------------------------------|------|------|-----------------------------------------------------------------|
| Zhao, 2018 | The general hospital                      | 8551 | 3432 | Significant difference<br>( $\chi^2$ test = 77.53, $p < 0.01$ ) |
|            | The traditional Chinese medicine hospital | 4856 | 1870 |                                                                 |
|            | The women and children's hospital         | 4776 | 2408 |                                                                 |
|            | Other specialized hospitals               | 2169 | 1043 |                                                                 |

Table S40. B11-Region

| Author     | Group              | No Dispute/<br>Harmony | Dispute/<br>Tension | Results                                                                                                                                           |
|------------|--------------------|------------------------|---------------------|---------------------------------------------------------------------------------------------------------------------------------------------------|
| Zhao, 2018 | The eastern region | 8970                   | 3351                | Significant difference<br>( $\chi^2$ test = 108, $p < 0.01$ )<br>The western region vs.<br>The eastern region (OR<br>= 0.81, 95%CI:0.75–<br>0.87) |
|            | The central region | 4985                   | 2154                |                                                                                                                                                   |
|            | The western region | 6397                   | 3248                |                                                                                                                                                   |

Table S41. B12-Department

| Author     | Group                        | No Dispute/<br>Harmony | Dispute/<br>Tension | Results                                                                                                                                  |
|------------|------------------------------|------------------------|---------------------|------------------------------------------------------------------------------------------------------------------------------------------|
| Zhao, 2018 | Internal medicine            | 5711                   | 2210                | Significant difference<br>( $\chi^2$ test = 100.49, $p < 0.01$ )<br>Paediatrics vs. Internal<br>medicine (OR = 0.82,<br>95%CI:0.71–0.95) |
|            | Surgery                      | 2143                   | 794                 |                                                                                                                                          |
|            | Gynaecology and obstetrics   | 4416                   | 2150                |                                                                                                                                          |
|            | Paediatrics                  | 1673                   | 860                 |                                                                                                                                          |
|            | Traditional Chinese Medicine | 1300                   | 423                 |                                                                                                                                          |
|            | Other                        | 5109                   | 2316                |                                                                                                                                          |

Table S42. B13-Whether First Visit

| Author     | Group | No Dispute/<br>Harmony | Dispute/<br>Tension | Results                                                                                                       |
|------------|-------|------------------------|---------------------|---------------------------------------------------------------------------------------------------------------|
| Zhao, 2018 | Yes   | 8979                   | 4122                | Significant difference<br>( $\chi^2$ test = 21.87, $p < 0.01$ )<br>Yes vs. No (OR = 1.09,<br>95%CI:1.01–1.17) |
|            | No    | 11,373                 | 4631                |                                                                                                               |

Table S43. B14-Registration

| Author     | Group                         | No Dispute/<br>Harmony | Dispute/<br>Tension | Results                                                               |
|------------|-------------------------------|------------------------|---------------------|-----------------------------------------------------------------------|
| Zhao, 2018 | Through making an appointment | 11,601                 | 4987                | No significant<br>difference<br>( $\chi^2$ test = 0.000, $p = 0.97$ ) |
|            | Through Service windows       | 8751                   | 3766                |                                                                       |

Table S44. B15-Sources of Patients

| Author     | Group                              | No Dispute/<br>Harmony | Dispute/<br>Tension | Results                |
|------------|------------------------------------|------------------------|---------------------|------------------------|
| Zhao, 2018 | Local population with registration | 12,746                 | 5396                | Significant difference |

|                                       |      |      |                                          |
|---------------------------------------|------|------|------------------------------------------|
| Local population without registration | 3421 | 1601 | $(\chi^2 \text{ test} = 9.49, p < 0.01)$ |
| Non-local population                  | 4185 | 1756 |                                          |

**Table S45. B16-Whether Have Family Doctors**

| Author     | Group | No Dispute/<br>Harmony | Dispute/<br>Tension | Results                                                                |
|------------|-------|------------------------|---------------------|------------------------------------------------------------------------|
| Zhao, 2018 | Yes   | 1218                   | 332                 | Significant difference<br>( $\chi^2 \text{ test} = 117.91, p < 0.01$ ) |
|            | No    | 19,134                 | 8421                | Yes vs. No (OR = 0.72,<br>95%CI: 0.61–0.84)                            |

**Table S46. B17-Referral**

| Author     | Group | No Dispute/<br>Harmony | Dispute/<br>Tension | Results                                                                    |
|------------|-------|------------------------|---------------------|----------------------------------------------------------------------------|
| Zhao, 2018 | Yes   | 19,523                 | 8399                | No significant<br>difference<br>( $\chi^2 \text{ test} = 0.01, p = 0.91$ ) |
|            | No    | 829                    | 354                 |                                                                            |

**Table S47. B18-Operation**

| Author     | Group | No Dispute/<br>Harmony | Dispute/<br>Tension | Results                                                                     |
|------------|-------|------------------------|---------------------|-----------------------------------------------------------------------------|
| Wang, 2015 | Yes   | 242                    | 128                 | No significant<br>difference<br>( $\chi^2 \text{ test} = 0.66, p = 0.417$ ) |
|            | No    | 170                    | 78                  |                                                                             |

## PERSPECTIVE OF THERAPEUTIC INTERACTION

**Table S48. C1-Health Worker-Patient Trust**

| Author      | Group         | No Dispute/<br>Harmony | Dispute/<br>Tension | Results                                                                  |
|-------------|---------------|------------------------|---------------------|--------------------------------------------------------------------------|
| Zhao, 2017  | Trust         | 72                     | 211                 | Significant difference<br>( $\chi^2 \text{ test} - p < 0.05$ )           |
|             | General       | 24                     | 157                 |                                                                          |
|             | Distrust      | 7                      | 59                  |                                                                          |
| Zhang, 2011 | 0–4           | 8                      | 9                   | Significant difference<br>( $\chi^2 \text{ test} = 28.116, p = 0.000$ )  |
|             | 5–6           | 35                     | 61                  |                                                                          |
|             | 7–8           | 121                    | 121                 |                                                                          |
|             | 9–10          | 100                    | 43                  |                                                                          |
| Yang, 2014  | Very trust    | 303                    | 11                  | Significant difference<br>( $\chi^2 \text{ test} = 220.752, P = 0.000$ ) |
|             | Trust         | 960                    | 117                 |                                                                          |
|             | Distrust      | 68                     | 62                  |                                                                          |
|             | Very Distrust | 5                      | 13                  |                                                                          |

Table S49. C2-Service Attitude

| Author      | Group             | No Dispute/<br>Harmony | Dispute/<br>Tension | Results                                                          |
|-------------|-------------------|------------------------|---------------------|------------------------------------------------------------------|
| Zhang, 2011 | Very satisfied    | 45                     | 25                  | Significant difference<br>( $\chi^2$ test = 19.293, $p$ = 0.001) |
|             | Satisfied         | 174                    | 134                 |                                                                  |
|             | General           | 39                     | 69                  |                                                                  |
|             | Dissatisfied      | 5                      | 4                   |                                                                  |
|             | Very dissatisfied | 1                      | 3                   |                                                                  |
| Wang, 2015  | Good              | 282                    | 112                 | Significant difference<br>( $\chi^2$ test = 11.778, $p$ = 0.001) |
|             | Poor              | 130                    | 94                  |                                                                  |

Table S50. C3-Service Quality and Level

| Author      | Group             | No Dispute/<br>Harmony | Dispute/<br>Tension | Results                                                          |
|-------------|-------------------|------------------------|---------------------|------------------------------------------------------------------|
| Zhang, 2011 | Very satisfied    | 45                     | 23                  | Significant difference<br>( $\chi^2$ test = 14.358, $p$ = 0.006) |
|             | Satisfied         | 182                    | 150                 |                                                                  |
|             | General           | 34                     | 56                  |                                                                  |
|             | Dissatisfied      | 2                      | 3                   |                                                                  |
|             | Very dissatisfied | 1                      | 2                   |                                                                  |

Table S51. C4-Treatment Effect

| Author      | Group             | No Dispute/<br>Harmony | Dispute/<br>Tension | Results                                                          |
|-------------|-------------------|------------------------|---------------------|------------------------------------------------------------------|
| Zhang, 2011 | Very satisfied    | 39                     | 22                  | Significant difference<br>( $\chi^2$ test = 16.632, $p$ = 0.002) |
|             | Satisfied         | 185                    | 147                 |                                                                  |
|             | General           | 36                     | 58                  |                                                                  |
|             | Dissatisfied      | 4                      | 3                   |                                                                  |
|             | Very dissatisfied | 0                      | 4                   |                                                                  |

Table S52. C5-Whether Health Worker Receives Kickbacks on Medications or Medical Devices

| Author      | Group | No Dispute/<br>Harmony | Dispute/<br>Tension | Results                                                         |
|-------------|-------|------------------------|---------------------|-----------------------------------------------------------------|
| Zhang, 2011 | Yes   | 148                    | 153                 | Significant difference<br>( $\chi^2$ test = 4.519, $p$ = 0.034) |
|             | No    | 116                    | 81                  |                                                                 |

Table S53. C6-Whether Adequate Medical Information is Shared

| Author      | Group | No Dispute/<br>Harmony | Dispute/<br>Tension | Results                                                        |
|-------------|-------|------------------------|---------------------|----------------------------------------------------------------|
| Zhang, 2011 | Yes   | 249                    | 208                 | Significant difference<br>( $\chi^2$ test = 4.84, $p$ = 0.028) |
|             | No    | 15                     | 26                  |                                                                |

**Table S54.** C7-Health Worker-Patient Communication

| Author          | Group    | No Dispute/<br>Harmony | Dispute/<br>Tension | Results                                                         |
|-----------------|----------|------------------------|---------------------|-----------------------------------------------------------------|
| Yang, 2014 [75] | 1 (Good) | 243                    | 8                   | Significant difference<br>( $\chi^2$ test = 238.5, $p$ = 0.000) |
|                 | 2        | 998                    | 108                 |                                                                 |
|                 | 3        | 88                     | 69                  |                                                                 |
|                 | 4 (Poor) | 7                      | 18                  |                                                                 |

**Table S55.** C8-Whether Patient Bribes or Entertains Doctors

| Author           | Group | No Dispute/<br>Harmony | Dispute/<br>Tension | Results                                                        |
|------------------|-------|------------------------|---------------------|----------------------------------------------------------------|
| Zhang, 2011 [74] | Yes   | 124                    | 137                 | Significant difference<br>( $\chi^2$ test = 6.666, $p$ = 0.01) |
|                  | No    | 140                    | 97                  |                                                                |
